# Supplementary material for: Coordination complexes of zinc and manganese based on pyridine-2,5-dicarboxylic acid N-oxide: DFT studies and antiproliferative activities consideration
Source: Royal Society of Chemistry journal article supplement (doi:10.1039/d1ra08258b), 2021-01-01
Supplement: d1ra08258b1.pdf [file d1ra08258b1.pdf]

## Electronic Supporting Material

### Coordination complexes of zinc and manganese based on pyridine-2,5-dicarboxylic acid *N*-oxide: DFT studies and antiproliferative activities consideration

Hanie Alizadeh<sup>a</sup>, Masoud Mirzaei<sup>a,\*</sup>, Amir Sh. Saljooghi<sup>a</sup>, Vida Jodaian<sup>b</sup>, Maryam Bazargan,<sup>a</sup> Joel T. Mague,<sup>c</sup> Rosa M. Gomila<sup>d</sup> and Antonio Frontera<sup>d</sup>

<sup>a</sup>*Department of Chemistry, Faculty of Science, Ferdowsi University of Mashhad, Mashhad 9177948974, Iran  
E-mail: [mirzaeesh@um.ac.ir](mailto:mirzaeesh@um.ac.ir)*

<sup>b</sup>*Department of Chemistry, Islamshahr Branch, Islamic Azad University, Islamshahr, Iran*

<sup>c</sup>*Department of Chemistry, Tulane University, New Orleans, LA, 70118, USA*

<sup>d</sup>*Departament de Química, Universitat de les Illes Balears, Crta de Valldemossa km 7.5, 07122 Palma de Mallorca (Balears), SPAIN.*

## Contents

|                                                                                                               |   |
|---------------------------------------------------------------------------------------------------------------|---|
| <b>Fig. S1.</b> XRD pattern of <b>1</b> (simulated and experimental) .....                                    | 2 |
| <b>Fig. S2.</b> XRD pattern of <b>2</b> (simulated and experimental) .....                                    | 2 |
| <b>Fig. S3.</b> XRD pattern of <b>3</b> (simulated and experimental) .....                                    | 2 |
| <b>Fig. S4.</b> FTIR spectra of H <sub>2</sub> pydco, <b>1</b> , <b>2</b> and <b>3</b> .....                  | 3 |
| <b>Fig. S5.</b> TGA curves of <b>1</b> , <b>2</b> and <b>3</b> .....                                          | 3 |
| <b>Fig. S6.</b> Representation of the hydrogen bonding interactions between the 2D supramolecular layers..... | 4 |
| <b>Fig. S7.</b> Representation of the 1D linear chain along the <i>b</i> axis in <b>3</b> .....               | 4 |
| <b>Table S1.</b> Selected bond lengths (Å) and angles (°) for <b>1-3</b> .....                                | 5 |
| <b>Table S2.</b> Selected Hydrogen bond geometry, lengths (Å) and angles (°) for <b>1-3</b> .....             | 6 |
| <b>Table S3.</b> Coordination modes of the metallic centres and organic ligands in <b>1-3</b> .....           | 7 |

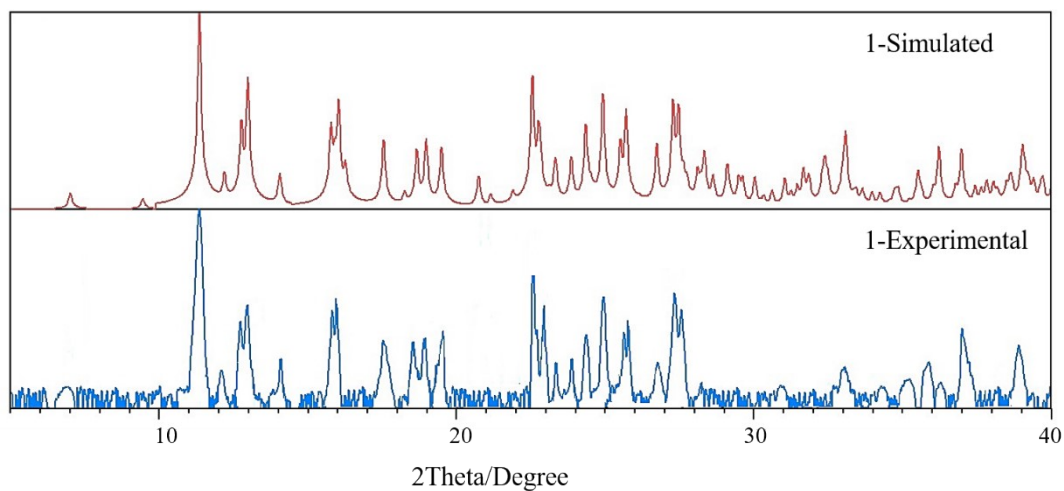

**Fig. S1.** XRD pattern of **1** (simulated and experimental).

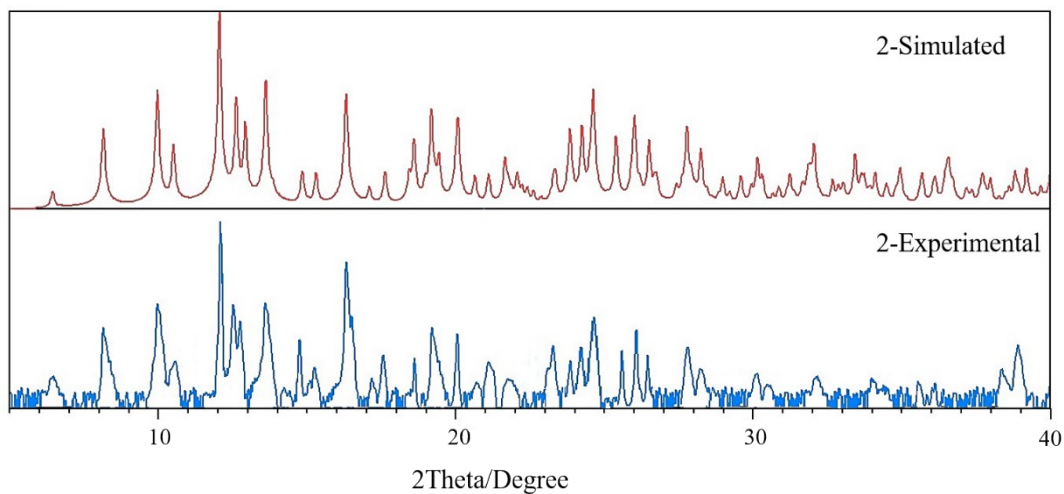

**Fig. S2.** XRD pattern of **2** (simulated and experimental).

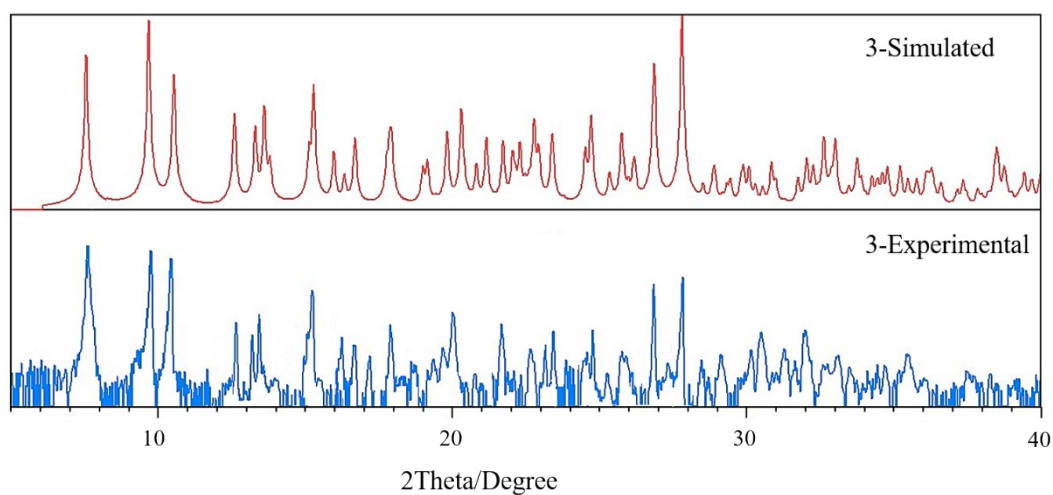

**Fig. S3.** XRD pattern of **3** (simulated and experimental).

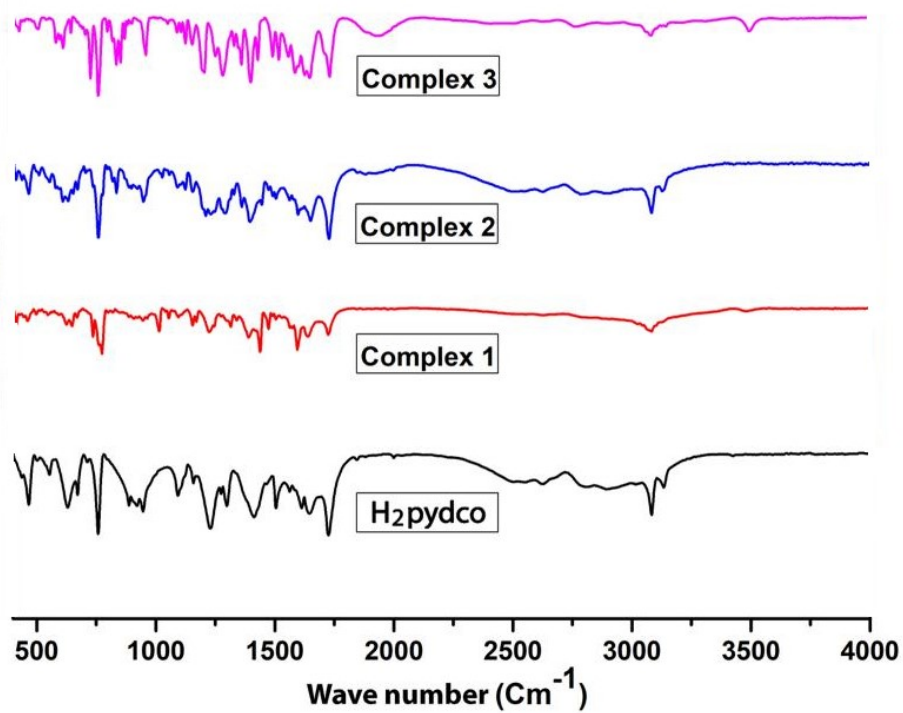

Fig. S4. FTIR spectra of H<sub>2</sub>pydco, 1, 2 and 3.

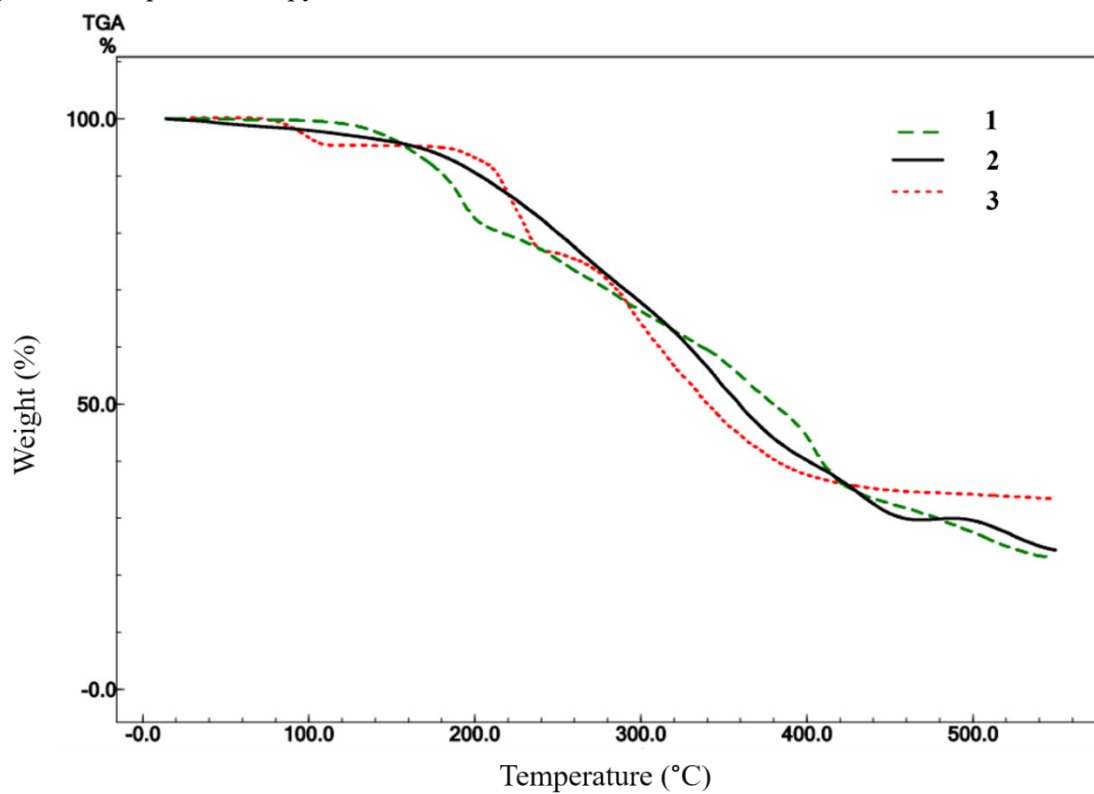

Fig. S5. TGA curves of 1, 2 and 3.

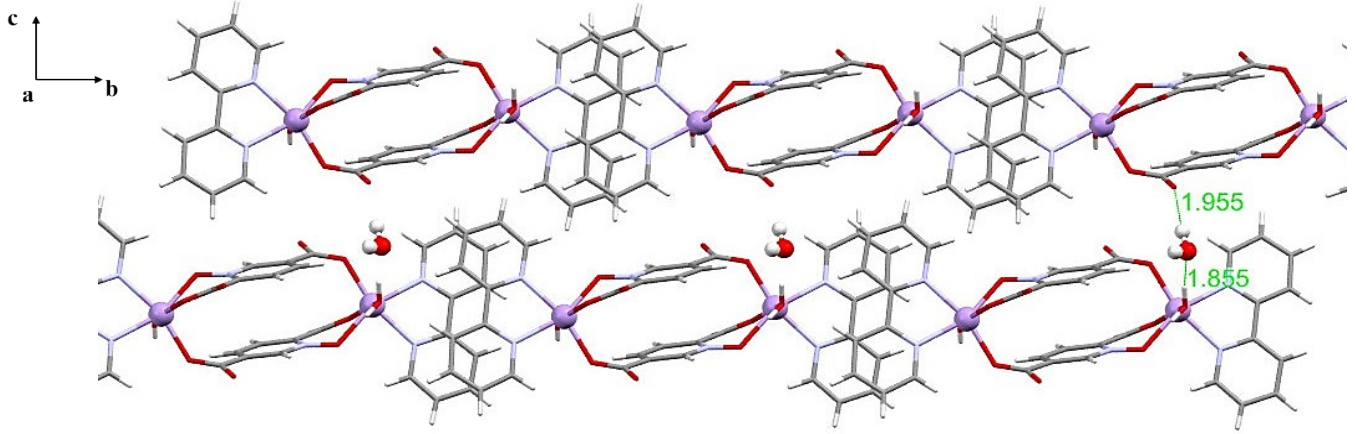

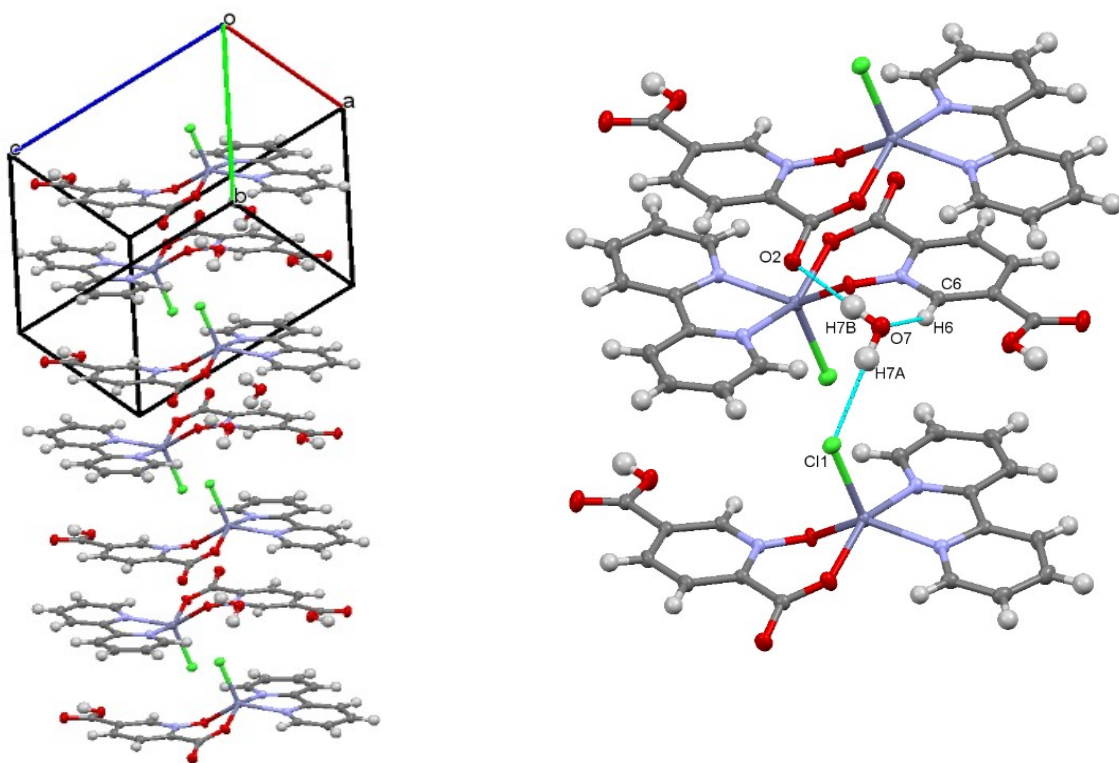

**Fig. S7.** Representation of the 1D linear chain along the *b* axis in **3**.

**Table S1.** Selected bond lengths (Å) and angles (°) for **1-3**.

| <b>1</b>  |            |            |            |
|-----------|------------|------------|------------|
| Mn1–O3    | 2.147(3)   | O5–Mn1–O6  | 92.51(11)  |
| Mn1–O1    | 2.126(3)   | O5–Mn1–N1  | 91.37(11)  |
| Mn1–O6    | 2.160(3)   | O5–Mn1–N2  | 163.70(11) |
| Mn1–O5    | 2.141(3)   | O1–Mn1–N2  | 95.52(12)  |
| Mn1–N1    | 2.250(3)   | N1–Mn1–N2  | 72.34(12)  |
| Mn1–N2    | 2.272(3)   | O1–Mn1–O3  | 78.26(11)  |
| O1–Mn1–O5 | 89.12(12)  | O3–Mn1–N1  | 159.19(12) |
| O1–Mn1–N1 | 104.64(11) | O1–Mn1–O6  | 159.05(11) |
| O3–Mn1–N2 | 86.90(11)  | O6–Mn1–N2  | 88.73(11)  |
| O5–Mn1–O3 | 109.36(11) | O6–Mn1–N1  | 96.21(11)  |
| O3–Mn1–O6 | 81.51(10)  | O5–Mn1–O6  | 92.51(11)  |
| <b>2</b>  |            |            |            |
| Zn1–O1    | 2.0706(18) | N4–Zn1–O6  | 97.09(8)   |
| Zn1–N3    | 2.101(2)   | O1–Zn1–O3  | 82.63(7)   |
| Zn1–N4    | 2.108(2)   | N3–Zn1–O3  | 91.56(8)   |
| Zn1–O6    | 2.1152(19) | N4–Zn1–O3  | 97.33(8)   |
| Zn1–O3    | 2.120(2)   | O6–Zn1–O3  | 88.81(7)   |
| Zn1–O8    | 2.129(2)   | O1–Zn1–O8  | 88.58(7)   |
| O1–Zn1–N3 | 90.99(8)   | N3–Zn1–O8  | 97.88(8)   |
| O1–Zn1–N4 | 169.20(8)  | N4–Zn1–O8  | 93.04(8)   |
| N3–Zn1–N4 | 78.21(9)   | O6–Zn1–O8  | 82.50(7)   |
| O1–Zn1–O6 | 93.71(7)   | O3–Zn1–O8  | 167.22(7)  |
| N3–Zn1–O6 | 175.29(8)  | N4–Zn1–O6  | 97.09(8)   |
| <b>3</b>  |            |            |            |
| Zn1–O1    | 2.0242(10) | O3–Zn1–N3  | 87.54(4)   |
| Zn1–N2    | 2.0951(12) | O1–Zn1–Cl1 | 101.86(3)  |
| Zn1–Cl1   | 2.2739(4)  | N2–Zn1–Cl1 | 115.44(3)  |
| Zn1–O3    | 2.0251(10) | O1–Zn1–N2  | 89.51(4)   |
| Zn1–N3    | 2.1186(12) | O1–Zn1–N3  | 153.79(5)  |
| O1–Zn1–O3 | 86.15(4)   | N2–Zn1–N3  | 77.38(5)   |
| O3–Zn1–N2 | 135.47(4)  | O3–Zn1–Cl1 | 108.81(3)  |

| Complex | Coordination mode of metallic centre                                              | Coordination mode of the main ligand                                               | Coordination mode of auxiliary ligand                                               |
|---------|-----------------------------------------------------------------------------------|------------------------------------------------------------------------------------|-------------------------------------------------------------------------------------|
| 1       | 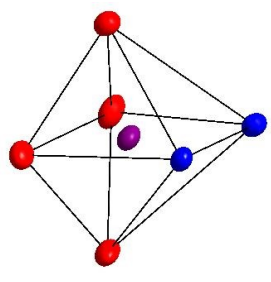 |  |  |

**Table S2.** Selected Hydrogen bond geometry, lengths (Å) and angles (°) for **1-3**.

| D-H...A       | D-H  | H...A | D...A      | D-H...A |
|---------------|------|-------|------------|---------|
| <b>1</b>      |      |       |            |         |
| O6-H6A...O7   | 0.87 | 1.85  | 2.714(4)   | 168.8   |
| O6-H6B...O2   | 0.87 | 1.87  | 2.742(4)   | 175.9   |
| C4-H4...O6    | 0.95 | 2.55  | 3.399(5)   | 148.4   |
| C7-H7...O7    | 0.95 | 2.55  | 3.269(5)   | 132.4   |
| C10-H10...O3  | 0.95 | 2.50  | 3.102(5)   | 121.3   |
| C16-H16...O2  | 0.95 | 2.56  | 3.377(5)   | 143.9   |
| O7-H7A...O4   | 0.87 | 1.95  | 2.824(4)   | 177.3   |
| O7-H7B...O4   | 0.87 | 2.04  | 2.870(4)   | 160.2   |
| <b>2</b>      |      |       |            |         |
| O4-H4A...O2   | 0.87 | 1.69  | 2.556(3)   | 176.5   |
| O9-H9...O6    | 0.87 | 1.77  | 2.631(3)   | 172.1   |
| C3-H3...O5    | 0.95 | 2.32  | 3.084(3)   | 136.7   |
| C10-H10...O10 | 0.95 | 2.51  | 3.330(3)   | 145.2   |
| C23-H23...O7  | 0.95 | 2.42  | 3.283(4)   | 150.9   |
| <b>3</b>      |      |       |            |         |
| O4-H4A...O6   | 0.87 | 1.67  | 2.5239(16) | 167.0   |
| C6-H6...O7    | 0.95 | 2.38  | 3.2645(18) | 155.1   |
| C11-H11...O5  | 0.95 | 2.49  | 3.3508(18) | 151.4   |
| O6-H6A...O7   | 0.87 | 1.82  | 2.6886(17) | 177.8   |
| O6-H6B...O5   | 0.87 | 1.97  | 2.8283(16) | 169.5   |
| O7-H7A...C11  | 0.87 | 2.34  | 3.2103(12) | 177.2   |
| O7-H7B...O2   | 0.87 | 1.89  | 2.7552(16) | 178.4   |

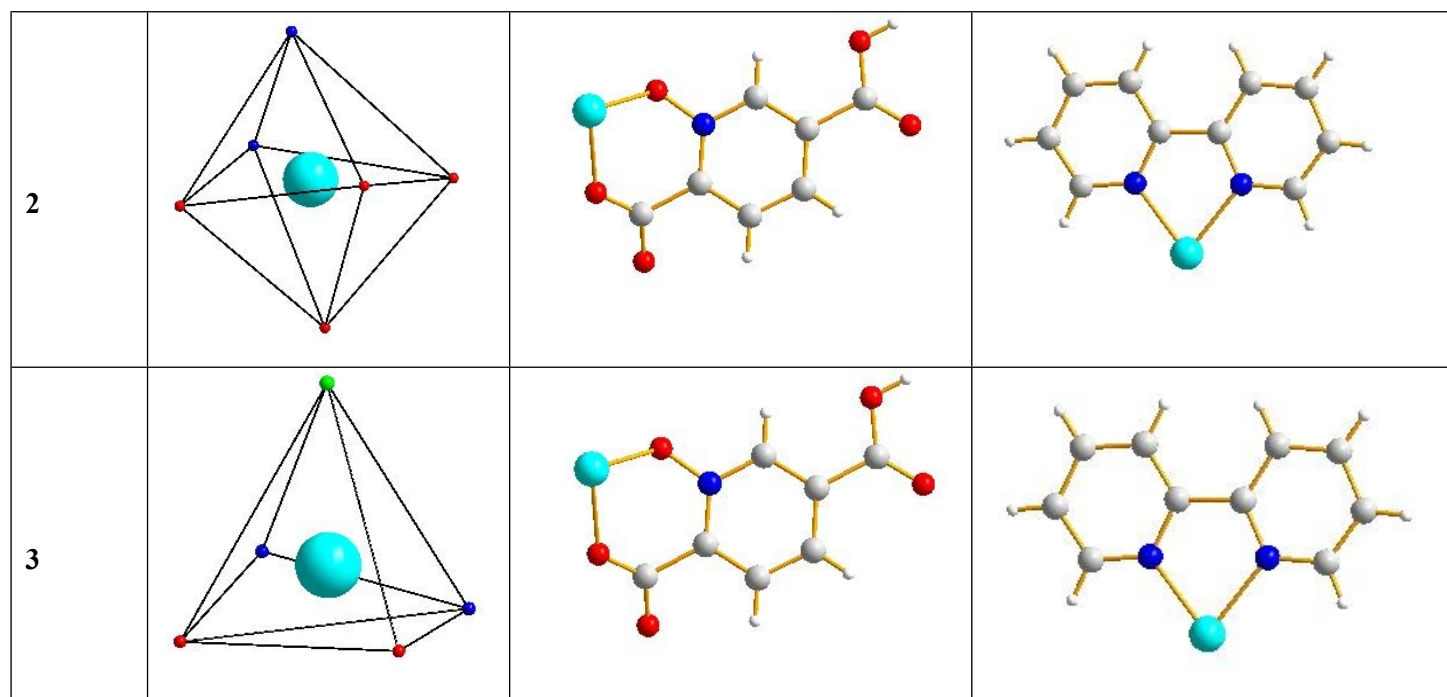

**Table S3.** Coordination modes of the metallic centres and organic ligands in **1-3**.
